# Supplementary figures and images for: Complete1H and13C NMR assignment and31P NMR determination of pentacyclic triterpenic acids
Source: Royal Society of Chemistry journal article supplement (doi:10.1039/c6ay02565j), 2017-01-01

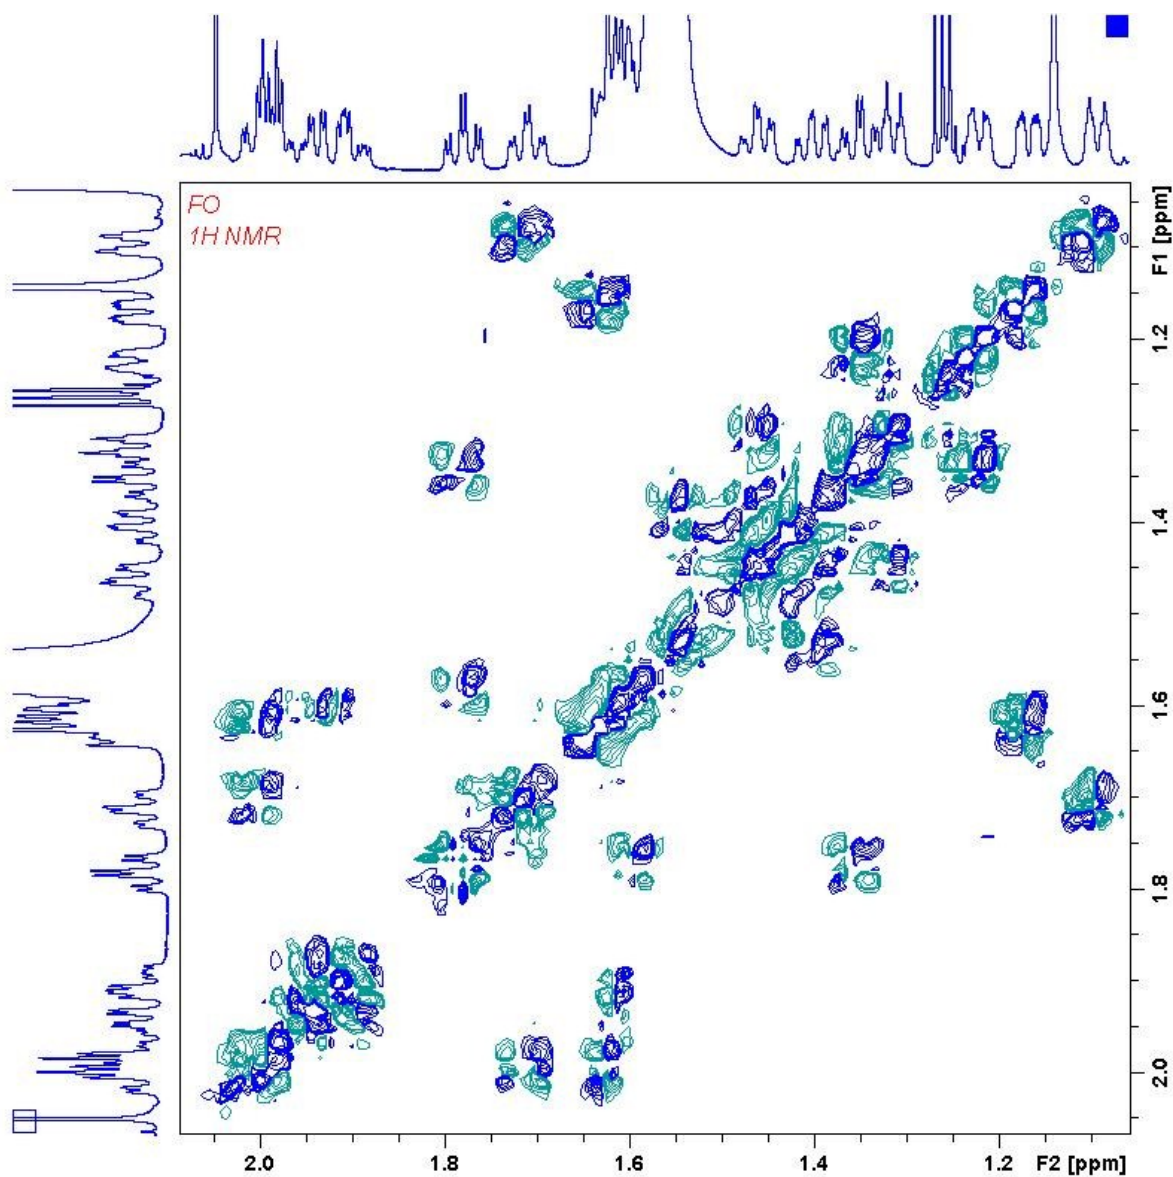

**Fig S1.** DQF-COSY spectrum of maslinic acid in  $\text{CDCl}_3$  solution

Supplement: c6ay02565j1.pdf [file c6ay02565j1.pdf]
